# Supplementary figures and images for: Intravenous lipo-prostaglandin E1 administration for patients with acute central retinal artery occlusion
Source: HighWire-hosted journal article supplement (doi:10.1136/bmjophth-2022-001014), 2022-05-01

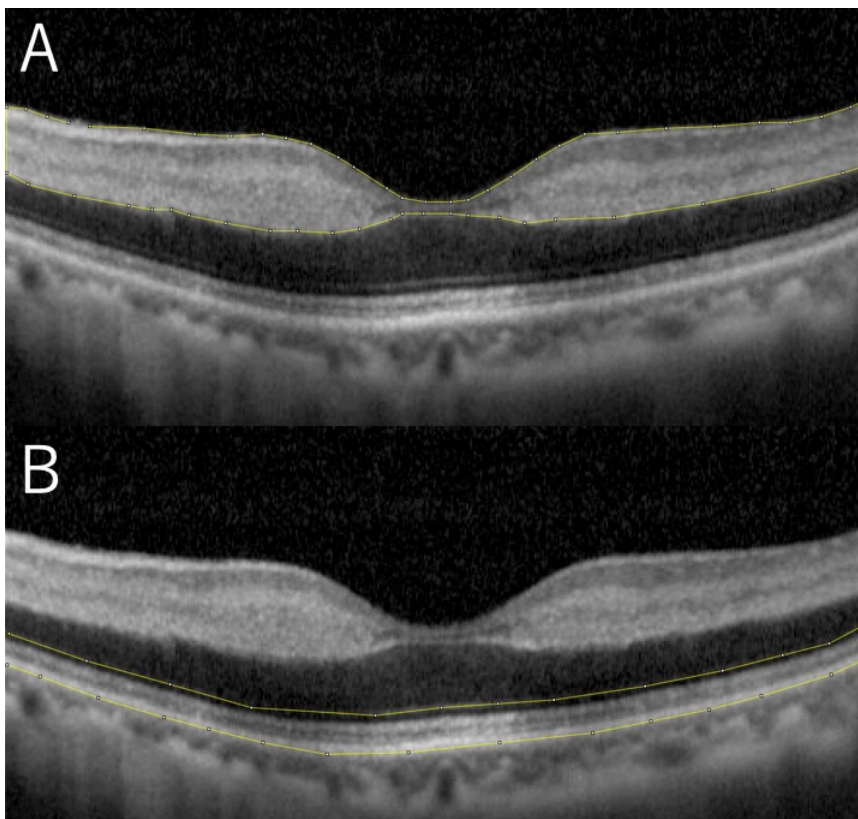

Supplement: bmjophth-2022-001014supp001_data_supplement.pdf [file bmjophth-2022-001014supp001_data_supplement.pdf]

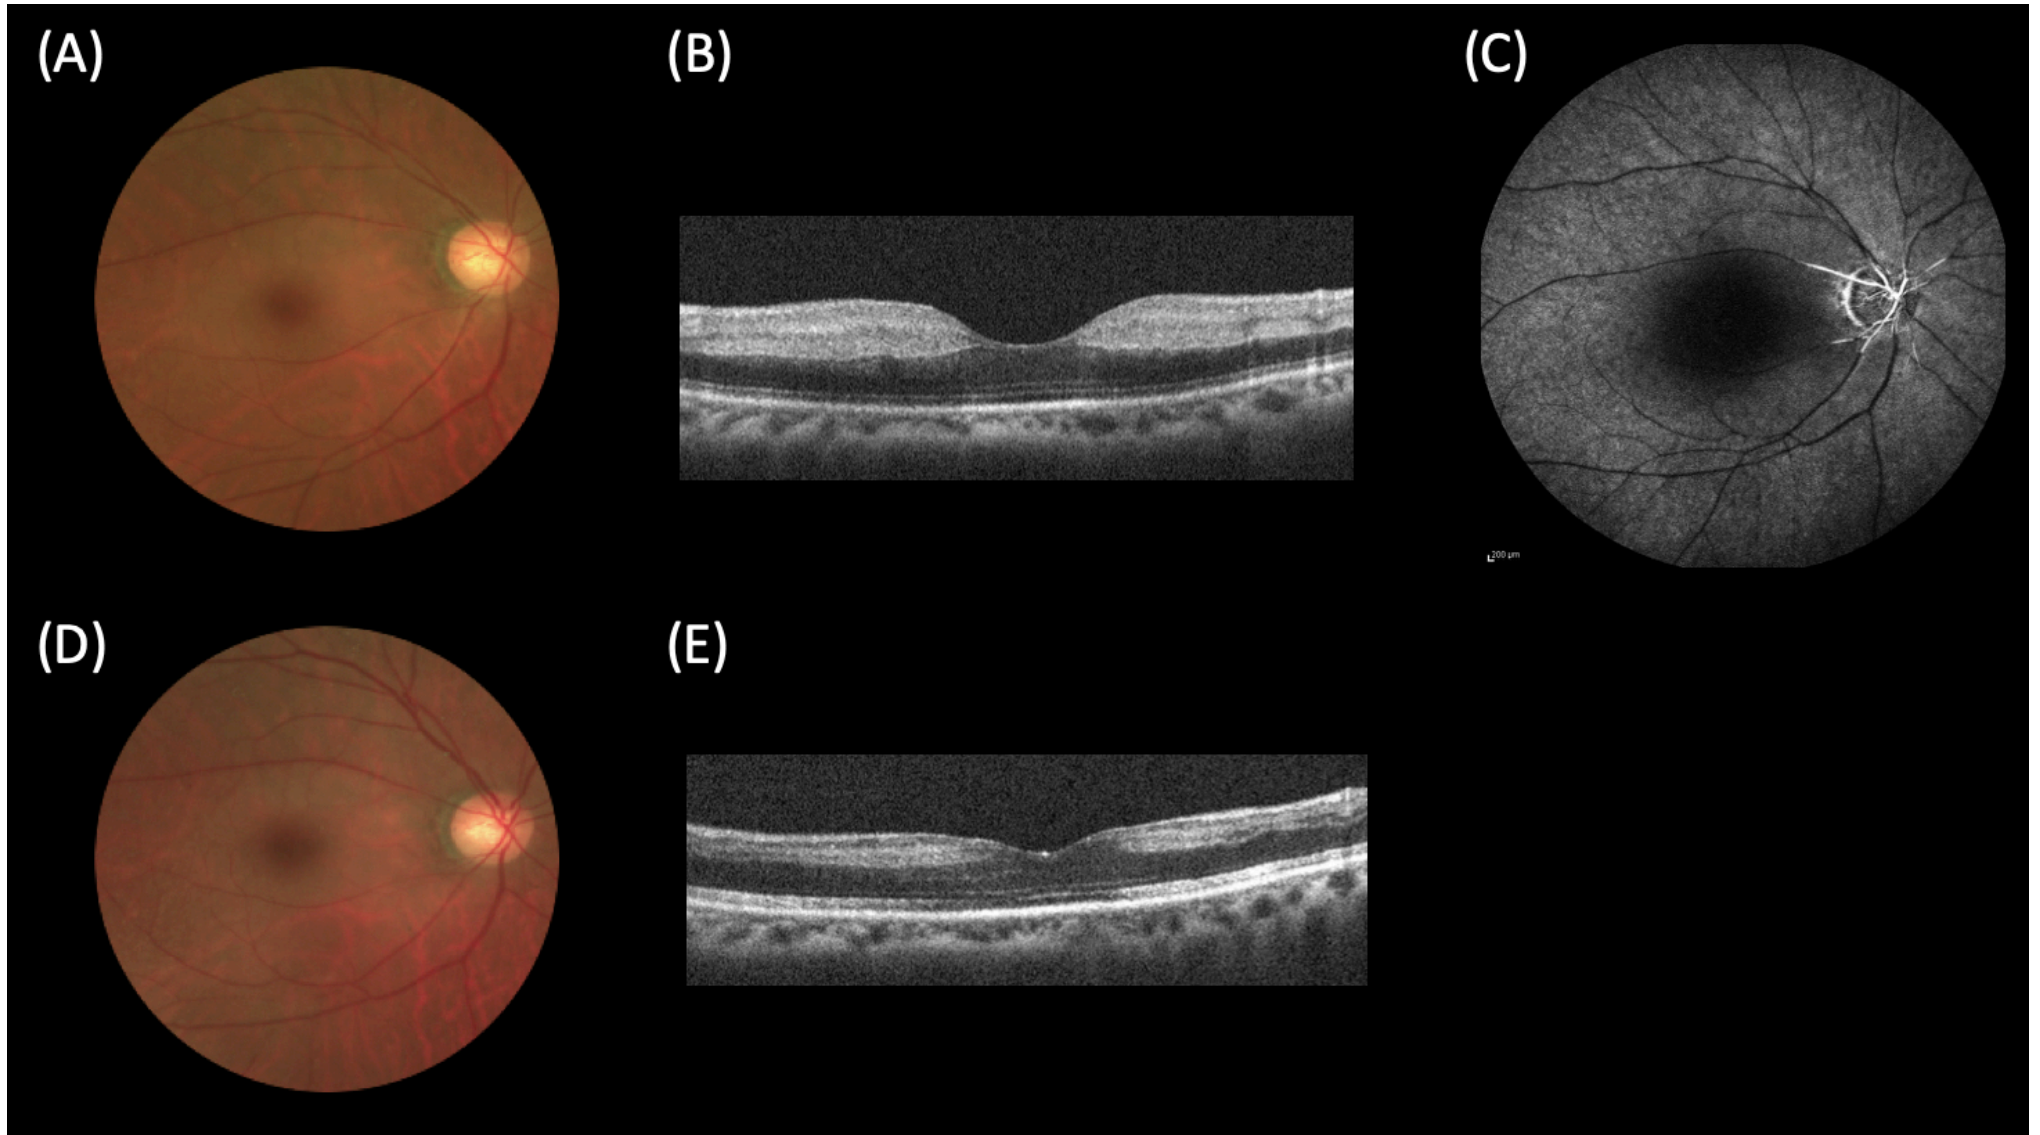

Supplement: bmjophth-2022-001014supp003_data_supplement.pdf [file bmjophth-2022-001014supp003_data_supplement.pdf]
